# Supplementary material for: Functional identification of an opsin kinase underlying inactivation of the pineal bistable opsin parapinopsin in zebrafish
Source: PubMed Central journal article supplement (PMC7881645; doi:10.1186/s40851-021-00171-1), 2021-02-12
Supplement: 40851_2021_171_MOESM1_ESM.pdf [file 40851_2021_171_MOESM1_ESM.pdf]

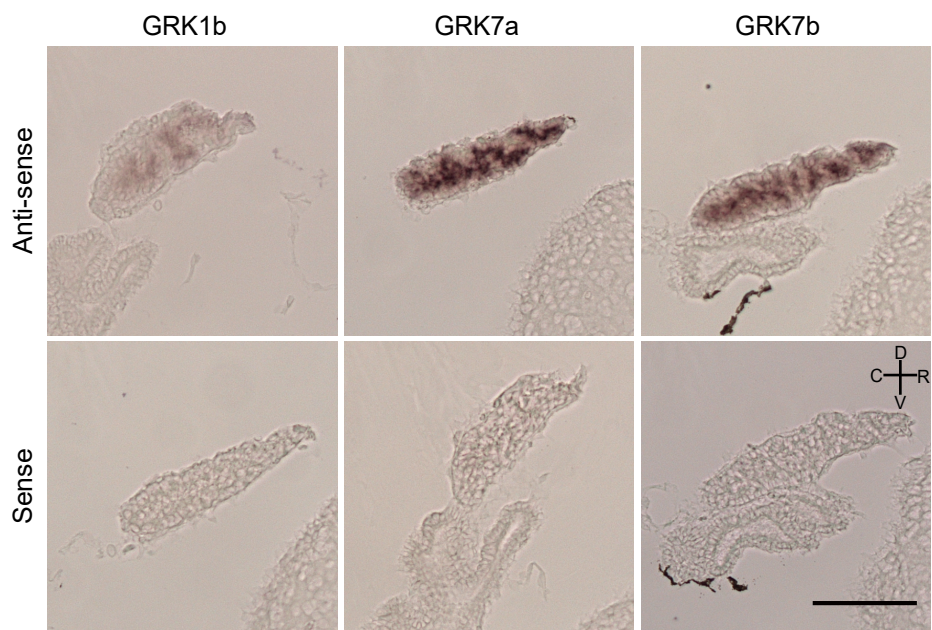

Shen et al, Supplementary Fig. S1
